# Supplementary material for: Release of Pro-Inflammatory/Angiogenic Factors by Retinal Microvascular Cells Is Mediated by Extracellular Vesicles Derived from M1-Activated Microglia
Source: MDPI journal article supplement (doi:10.3390/ijms25010015), 2023-12-19
Supplement: s1 [file s1]

## Supplementary Material

**Figure S1. Protein content-based EV characterization.** One/two protein(s) from each category suggested by the MISEV Guidelines 2018 (Théry et al., 2018) were chosen and their presence in EV lysates checked by Western blotting: CD63 (Abcam, ab134045), CD81 (Abcam, ab109201), ALIX (Abcam ab88388), ApoA1 (Abcam, ab52945), and GM130 (Abcam, ab52945). All primary antibodies were rabbit anti-human and diluted 1:1000. Secondary antibody: Goat anti-rabbit IgG (Abcam, ab97051), dilution 1:20000. EV from all experimental conditions were positive for the characteristic EV markers CD63, CD81, and ALIX, negative for the contaminant lipoprotein ApoA1, and slightly positive for GM130.

<sup>1</sup>Théry C. et al (2018). Minimal information for studies of extracellular vesicles 2018 (MISEV2018): a position statement of the International Society for Extracellular Vesicles and update of the MISEV2014 guidelines. *Journal of extracellular vesicles*, 7(1), 1535750. <https://doi.org/10.1080/20013078.2018.1535750>

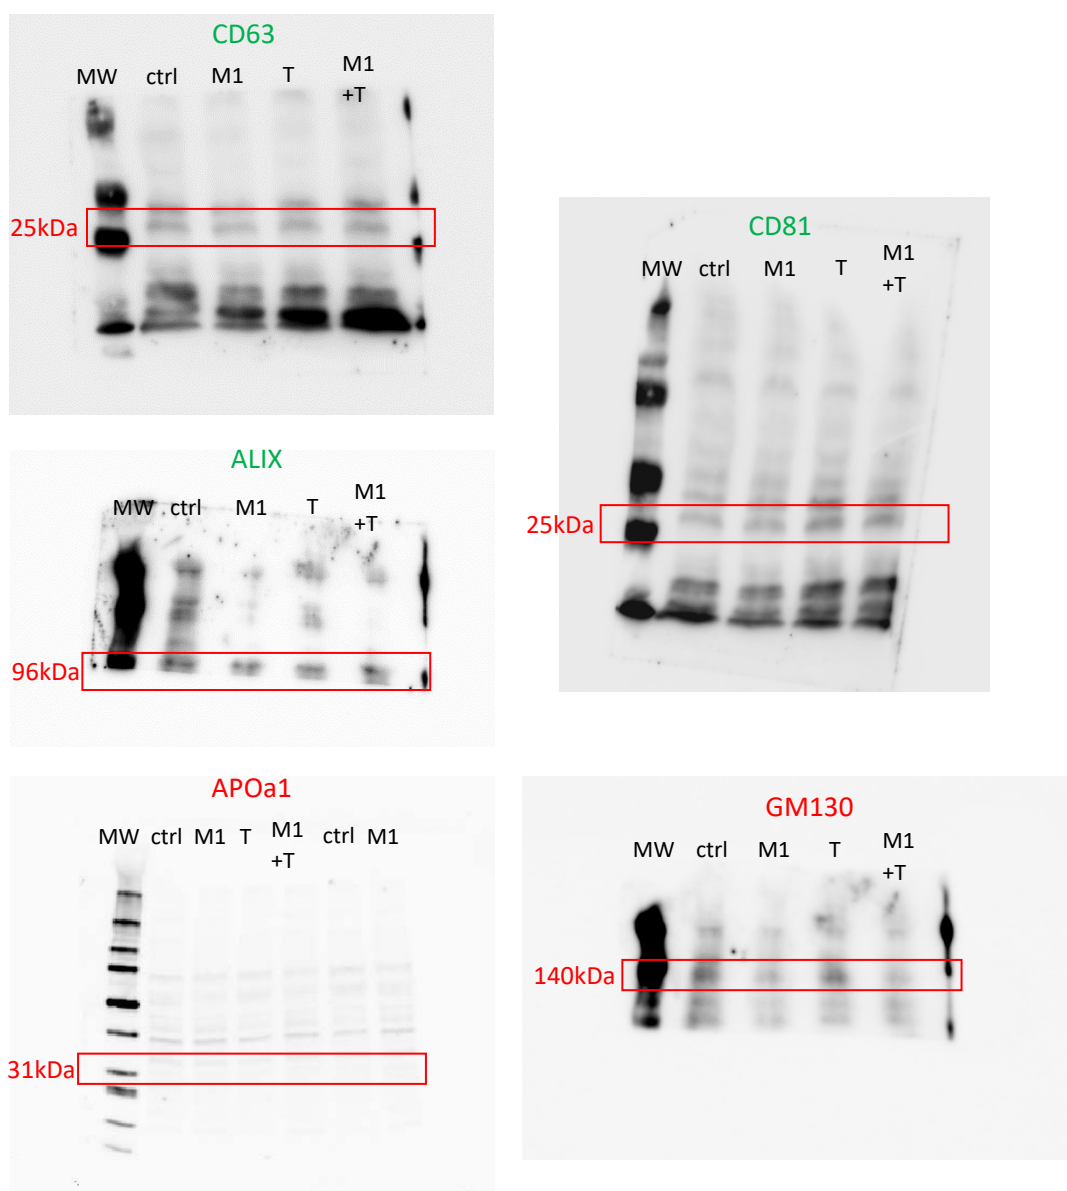

**Table S1. Human mRNA primers** (Applied Biosystems)

|       | <i>forward</i>            | <i>reverse</i>            |
|-------|---------------------------|---------------------------|
| MMP2  | AGCGAGTGGATGCCGCCTTTAA    | CATTCCAGGCATCTGCGATGAG    |
| MMP9  | CTGAGTCAGCACTTGCCTGTCA    | TATGCTTACCCCAGAACCCTCCAAT |
| VCAM1 | CTTTTGGAGTCGAAGATGAGGAAA  | CACTACTATCGCAAAACTGACTGAA |
| CCL2  | CCACTTATCACTCATGGAAGATCCC | GAGTAACTGCGCTGAGTGTGTT    |

**Table S2. Human miRNA primers** (Applied Biosystems)

|          |                         |
|----------|-------------------------|
| miR-21   | TAGCTTATCAGACTGATGTTGA  |
| miR-155  | TTAATGCTAATCGTGATAGGGGT |
| miR-146a | TGAGAACTGAATTCCATGGGTT  |

**Table S3. ELISA kits**

| <i>Kit</i>                                         | <i>Producer (Distributor)</i> | <i>Cat. #</i> |
|----------------------------------------------------|-------------------------------|---------------|
| Cell Proliferation ELISA BrdU                      | Roche (Merck)                 | 11647229001   |
| Cell Death Detection ELISA <sup>PLUS</sup>         | Roche (Merck)                 | 11774425001   |
| QCM Chemotaxis Cell Migration Assay                | Merck                         | ECM508        |
| IL-1 beta Human ELISA Kit                          | Invitrogen (ThermoFisher)     | BMS224-2      |
| IL-6 Human ELISA Kit                               | Invitrogen (ThermoFisher)     | BMS213-2      |
| MMP9 Human ELISA Kit                               | Invitrogen (ThermoFisher)     | BMS2016-2     |
| MCP-1/CCL2 Human Uncoated ELISA Kit                | Invitrogen (ThermoFisher)     | 88-7399-22    |
| Angiopoietin 2 Human ELISA Kit                     | Invitrogen (ThermoFisher)     | KHC1641       |
| TNF alpha Human ELISA Kit                          | Invitrogen (ThermoFisher)     | KAC1751       |
| VEGF-A Cell Lysates Human ELISA Kit                | Invitrogen (ThermoFisher)     | EHVEGFACL     |
| VEGF Human ELISA Kit ( <i>supernatants</i> )       | Invitrogen (ThermoFisher)     | KHG0111       |
| PDGF-BB (CSRP2) Human ELISA Kit ( <i>lysates</i> ) | Invitrogen (ThermoFisher)     | EHCSR2P       |
| PDGF-BB Human ELISA Kit ( <i>supernatants</i> )    | Invitrogen (ThermoFisher)     | BMS2071       |
